# Supplementary material for: Immortal time bias in older vs younger age groups: a simulation study with application to a population-based cohort of patients with colon cancer
Source: bioRxiv or medRxiv preprint supplement (doi:10.1101/2022.03.11.22272268), 2022-03-13
Supplement: Supplementary file [file media-1.pdf]

# **Immortal time bias in older vs younger age groups: a simulation study with application to a population-based cohort of patients with colon cancer**

Sophie Pilleron, Camille Maringe, Eva JA Morris, Clémence Leyrat

---

## **List of Figures**

Figure 1 – Scenarios 5-7

## **List of Tables**

Table 1 - Values of the shape and scale parameters of the Weibull distributions for the 7 scenarios

Table 2 – Difference in one-year overall survival based on the different methods and scenarios and its associated standard error (SE)

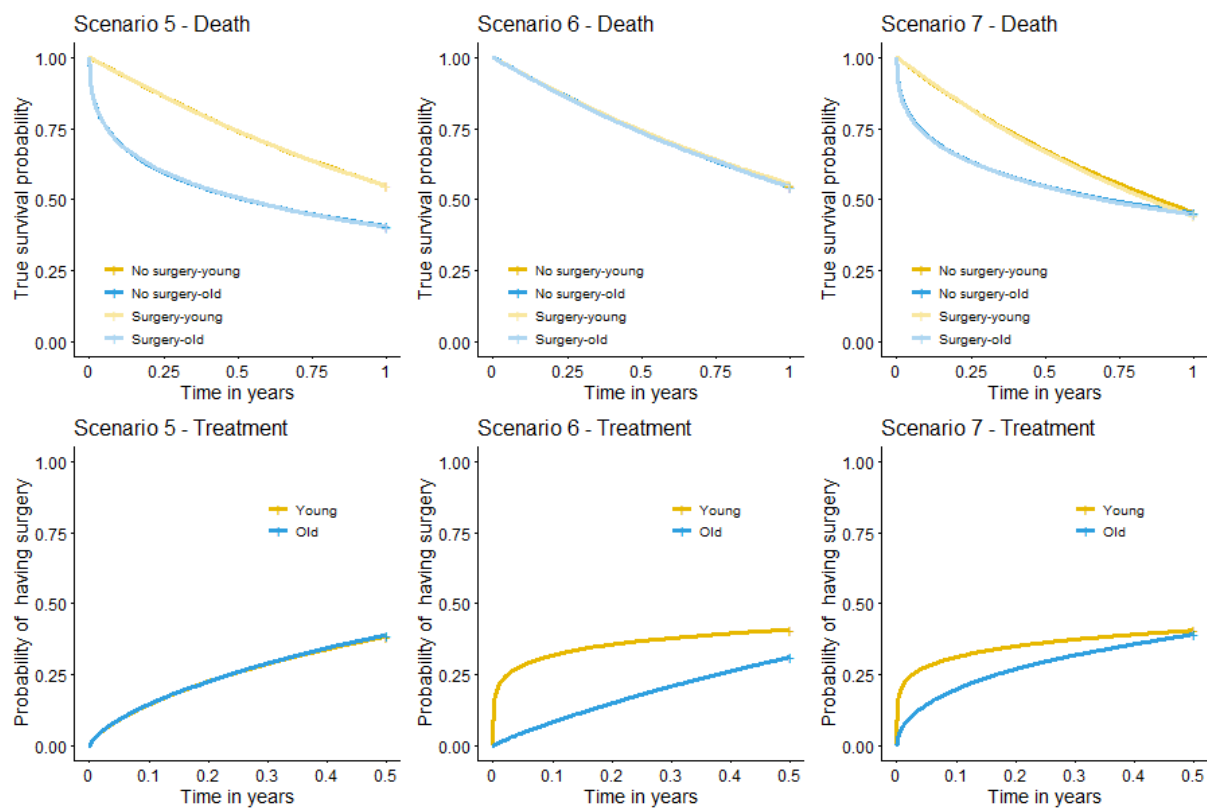

**Figure 1 – Scenarios 5-7**

**Table 1** - Values of the shape and scale parameters of the Weibull distributions for the 7 scenarios

| Scenario | Treatment model  |       |                |       | Survival model   |       |                |       |
|----------|------------------|-------|----------------|-------|------------------|-------|----------------|-------|
|          | Younger patients |       | Older patients |       | Younger patients |       | Older patients |       |
|          | Scale            | Shape | Scale          | Shape | Scale            | Shape | Scale          | Shape |
| 1        | 0,8              | 0,7   | 0,8            | 0,7   | 0,8              | 1     | 0,8            | 1     |
| 2        | 0,8              | 0,7   | 0,8            | 0,7   | 0,8              | 1     | 0,8            | 0,4   |
| 3        | 0,6              | 0,2   | 0,7            | 0,5   | 0,6              | 1     | 0,6            | 1     |
| 4        | 0,6              | 0,2   | 0,7            | 0,9   | 0,6              | 1     | 0,9            | 0,4   |
| 5        | 0,8              | 0,7   | 0,8            | 0,7   | 0,6              | 1     | 0,9            | 0,4   |
| 6        | 0,6              | 0,2   | 0,7            | 0,9   | 0,6              | 1     | 0,6            | 1     |
| 7        | 0,6              | 0,2   | 0,7            | 0,5   | 0,8              | 1     | 0,8            | 0,4   |

**Table 2** – Difference in one-year overall survival based on the different methods and scenarios and its associated standard error (SE)

| Scenario | Time-fixed Cox Model |                |                  |              | Landmark analysis |              |                  |              | Time-varying Cox model |              |                  |              | Delayed e      |              |
|----------|----------------------|----------------|------------------|--------------|-------------------|--------------|------------------|--------------|------------------------|--------------|------------------|--------------|----------------|--------------|
|          | Older patients       |                | Younger patients |              | Older patients    |              | Younger patients |              | Older patients         |              | Younger patients |              | Older patients |              |
|          | Estimate*            | Empirical SE** | Estimate         | Empirical SE | Estimate          | Empirical SE | Estimate         | Empirical SE | Estimate               | Empirical SE | Estimate         | Empirical SE | Estimate       | Empirical SE |
| 1        | -0.133               | 0.045          | -0.134           | 0.043        | 0.000             | 0.048        | -0.007           | 0.054        | -0.001                 | 0.049        | -0.005           | 0.047        | 0.000          | 0.007        |
| 2        | -0.302               | 0.045          | -0.134           | 0.043        | 0.001             | 0.046        | -0.007           | 0.054        | -0.005                 | 0.061        | -0.004           | 0.047        | -0.001         | 0.005        |
| 3        | -0.092               | 0.044          | -0.049           | 0.041        | -0.003            | 0.042        | -0.007           | 0.047        | 0.000                  | 0.047        | -0.006           | 0.042        | 0.000          | 0.009        |
| 4        | -0.319               | 0.047          | -0.049           | 0.041        | 0.001             | 0.053        | -0.007           | 0.047        | 0.003                  | 0.063        | -0.006           | 0.042        | 0.002          | 0.005        |
| 5        | -0.311               | 0.042          | -0.118           | 0.043        | 0.006             | 0.052        | -0.001           | 0.044        | 0.004                  | 0.059        | -0.002           | 0.049        | 0.000          | 0.005        |
| 6        | -0.120               | 0.045          | -0.048           | 0.044        | -0.002            | 0.051        | -0.001           | 0.043        | 0.008                  | 0.052        | -0.004           | 0.046        | 0.004          | 0.012        |
| 7        | -0.255               | 0.045          | -0.052           | 0.044        | 0.006             | 0.047        | 0.001            | 0.055        | 0.008                  | 0.058        | -0.001           | 0.045        | 0.000          | 0.003        |

\* Average estimated difference in 1-year overall survival probabilities across the 1000 simulations. The true value is 0.

\*\* Standard deviation of the 1000 estimated difference in 1-year overall survival probabilities
